# Supplementary material
Source: HighWire-hosted journal article supplement (https://gh.bmj.com/content/4/4/e001495)
Supplement: inline-supplementary-material-1 [file inline-supplementary-material-1.pdf]

Webannex A: Definition of indicators (all indicators stratified by public or private sector)

| <b>INDICATOR</b>                           | <b>DENOMINATOR</b>                                                                                                           | <b>NUMERATOR</b>                                                 |
|--------------------------------------------|------------------------------------------------------------------------------------------------------------------------------|------------------------------------------------------------------|
| <b>Antenatal care, four or more visits</b> | Women 15-49, live birth in the last 2 (MICS) years or 3 (DHS) years                                                          | 4+ visit(s) to any provider                                      |
| <b>Careseeking for diarrhoea</b>           | Live children, 0-59 months, with diarrhoea in the past 2 weeks                                                               | Sought treatment from a health facility or provider              |
| <b>Careseeking for pneumonia</b>           | Live children, 0-59 months, suspected pneumonia in the past 2 weeks (cough with faster breathe or have difficulty breathing) | Sought treatment from an appropriate health facility or provider |
| <b>Early initiation of breastfeeding</b>   | Live births in the last 2 (MICS) or 3 (DHS) years to women 15-49 (3)                                                         | Put to the breast within one hour of birth                       |
| <b>Place of delivery</b>                   | All live births in the last 2 years or 3 years                                                                               | Delivered at home or in a health facility                        |
| <b>Postnatal care for babies</b>           | Last-born in the last 2 years                                                                                                | Received postnatal within 2 days of birth                        |
