# Supplementary material
Source: HighWire-hosted journal article supplement (https://gh.bmj.com/content/4/4/e001495)
Supplement: inline-supplementary-material-2 [file inline-supplementary-material-2.pdf]

## Webannex B. Definitions of public and private providers, by country and indicator.

| Country     | Private                                                                                                                                                                         | Public                                                                                                                                                                                                                                                                                                                                      |
|-------------|---------------------------------------------------------------------------------------------------------------------------------------------------------------------------------|---------------------------------------------------------------------------------------------------------------------------------------------------------------------------------------------------------------------------------------------------------------------------------------------------------------------------------------------|
| Afghanistan | Private hospital/clinic; private doctor; other private sector; charity foundations; refugee camp; NGO; Marie stopes; red cross; private doctor's office; private maternity home | Government hospital; chc/polyclinic; basic health center; health sub-center; health post/sub-health post; community health worker; mobile clinic; other public sector                                                                                                                                                                       |
| Bangladesh  | Private hospital/clinic; qualified doctor; traditional doctor; NGO static clinic; NGO satellite clinic; other NGO; qualified doctor's chamber; NGO field worker                 | Public hospital; district hospital; maternal and child welfare center; upazila health complex; upazila health & family welfare center; satellite clinic/epi outreach; community clinic; other public sector                                                                                                                                 |
| Bhutan      | Private hospital; private physician                                                                                                                                             | Hospital; BHU; satellite clinic; village health worker; outreach clinic                                                                                                                                                                                                                                                                     |
| India       | Hospital/maternity home/clinic; other private health facility; NGO or trust hospital/clinic; doctor/clinic; paramedic; private vaidya/hakim/homeopath (ayush)                   | Government/municipality hospital; government dispensary; UHC/UHP/UFWC; CHC/rural hospital/Block PHC; PHC/additional PHC; sub-centre; anganwadi/ICDS centre; village clinic by ANM; other public sector health facility; vaidya/hakim/homeopath (ayush); sub-centre/ANM; government mobile clinic; other public sector health facility; camp |
| Maldives    | Private hospital/clinic/mobile clinic; other private                                                                                                                            | Government hospital/health center/health post; regional hospital; atoll hospital; other public; community health worker                                                                                                                                                                                                                     |
| Nepal       | Private hospital/nursing home; private clinic; other private medical facilities; NGO                                                                                            | Government hospital; primary health care center; health/sub health post; primary health care outreach clinic; FCHV; other public facilities                                                                                                                                                                                                 |
| Pakistan    | Private hospital/clinic; private doctor; homeopath; dispenser/compounder; other private                                                                                         | Government hospital; Rural health centre (RHC)/Mother child health centre(MCH); BHU/FWC; lady health worker; other public health                                                                                                                                                                                                            |

*Note: providers may vary for different indicators, within the same country. For example, in India homeopaths were considered only for careseeking for pneumonia or diarrhoea.*
