# Supplementary material
Source: HighWire-hosted journal article supplement (https://gh.bmj.com/content/4/4/e001495)
Supplement: inline-supplementary-material-3 [file inline-supplementary-material-3.pdf]

Webannex C. Types of facilities used for those who sought care in private sector, by indicator and country.

| Type of provider                                     | AFG           | BGD           | BTN           | IND           | MDV           | NPL           | PAK           |
|------------------------------------------------------|---------------|---------------|---------------|---------------|---------------|---------------|---------------|
| <b>Antenatal care</b>                                |               |               |               |               |               |               |               |
| Private: hospital/maternity home/clinic/nursing home | 42.7%         | 69.6%         |               | 96.0%         | 97.6%         | 98.4%         | 90.7%         |
| Private: qualified doctor                            | 62.1%         | 14.4%         |               |               |               |               | 10.9%         |
| Private: traditional/homeopath doctor                |               | 1.8%          |               |               |               |               | 0.1%          |
| Private: dispenser/compounder                        |               |               |               |               |               |               | 0.4%          |
| Private: other                                       |               |               |               | 2.3%          | 2.4%          | 0.7%          | 0.2%          |
| NGOs                                                 | 0.7%          | 23.6%         |               | 2.0%          | 0.0%          | 3.6%          | 0.0%          |
| <b>Total private sector</b>                          | <b>105.5%</b> | <b>109.5%</b> |               | <b>100.3%</b> | <b>100.0%</b> | <b>102.7%</b> | <b>102.3%</b> |
| <b>Institutional delivery</b>                        |               |               |               |               |               |               |               |
| Private: hospital/maternity home/clinic/nursing home | 87.1%         | 90.3%         | 100.0%        | 96.2%         | 93.5%         | 71.8%         | 99.9%         |
| Private: doctor's office                             | 10.8%         |               |               |               |               |               |               |
| Private: other medical sector/health facility        | 0.2%          |               |               | 1.9%          | 6.5%          |               | 0.1%          |
| NGOs                                                 | 1.9%          | 9.7%          |               | 1.9%          | 0.0%          | 4.4%          | 0.0%          |
| Sought private care in India                         |               |               |               |               |               | 23.8%         |               |
| <b>Total private sector</b>                          | <b>100.0%</b> |
| <b>Postnatal care</b>                                |               |               |               |               |               |               |               |
| Private: hospital/maternity home/clinic/nursing home | 69.8%         | 87.0%         |               | 96.7%         |               |               | 99.8%         |
| Private: doctor's office                             | 28.9%         |               |               |               |               |               |               |
| Private: qualified doctor's chamber                  |               | 1.1%          |               |               |               |               |               |
| Private: unqualified doctor's chamber                |               | 1.3%          |               |               |               |               |               |
| Private: pharmacy                                    |               | 0.4%          |               |               |               |               |               |
| Private: other sector health facility                |               |               |               | 1.4%          |               |               | 0.2%          |
| NGOs                                                 | 1.3%          | 10.3%         |               | 1.8%          |               |               | 0.0%          |
| <b>Total private sector</b>                          | <b>100.0%</b> | <b>100.0%</b> |               | <b>100.0%</b> |               |               | <b>100.0%</b> |
| <b>Early initiation of breastfeeding</b>             |               |               |               |               |               |               |               |
| Private: hospital/clinic/maternity home/nursing home | 90.9%         | 84.5%         | 100.0%        | 96.3%         | 90.5%         | 66.8%         | 99.7%         |
| Private: doctor's office                             | 8.5%          |               |               |               |               |               |               |
| Private: other                                       | 0.2%          |               |               | 1.8%          | 9.5%          |               | 0.3%          |
| NGOs                                                 | 0.5%          | 15.5%         |               | 1.9%          |               | 7.5%          |               |
| Sought private delivery care in India                |               |               |               |               |               | 25.7%         |               |
| <b>Total private sector</b>                          | <b>100.0%</b> |
| <b>Careseeking for diarrhoea</b>                     |               |               |               |               |               |               |               |
| Private: hospital/maternity home/clinic/nursing home | 37.3%         | 30.9%         |               | 26.3%         | 89.5%         | 100.0%        | 48.3%         |
| Private: doctor/clinic                               | 63.8%         | 72.6%         |               | 64.5%         |               |               | 53.1%         |

|                                         |               |               |               |               |               |               |               |
|-----------------------------------------|---------------|---------------|---------------|---------------|---------------|---------------|---------------|
| Private: paramedic                      |               |               |               | 2.9%          |               |               |               |
| Private: unqualified doctor             | 1.5%          |               |               |               |               |               |               |
| Private: vaidya/hakim/homeopath         |               |               |               | 1.5%          |               |               |               |
| Private: other                          |               |               |               | 2.6%          | 10.5%         |               | 0.2%          |
| NGOs                                    |               |               |               | 3.2%          |               |               |               |
| <b>Total private sector</b>             | <b>101.0%</b> | <b>105.0%</b> |               | <b>101.0%</b> | <b>100.0%</b> | <b>100.0%</b> | <b>101.6%</b> |
| <b>Careseeking for pneumonia</b>        |               |               |               |               |               |               |               |
| Private: hospital/clinic                | 38.2%         | 23.0%         |               | 25.8%         | 100.0%        | 100.0%        | 47.8%         |
| Private: doctor/clinic                  | 62.2%         | 76.1%         | 100.0%        | 66.7%         |               |               | 54.5%         |
| Private: paramedic                      |               |               |               | 3.0%          |               |               |               |
| Private: vaidya/hakim/homeopath (ayush) |               |               |               | 1.3%          |               |               |               |
| Private: other                          |               |               |               | 3.1%          |               |               |               |
| NGOs                                    |               | 1.6%          |               | 1.1%          |               |               |               |
| <b>Total private sector</b>             | <b>100.3%</b> | <b>100.7%</b> | <b>100.0%</b> | <b>101.1%</b> | <b>100.0%</b> | <b>100.0%</b> | <b>102.3%</b> |
