# Supplementary material
Source: HighWire-hosted journal article supplement (https://gh.bmj.com/content/4/4/e001495)
Supplement: inline-supplementary-material-5 [file inline-supplementary-material-5.pdf]

Webannex E. Wealth-related inequalities by country and public-private sector for five intervention coverage indicators.

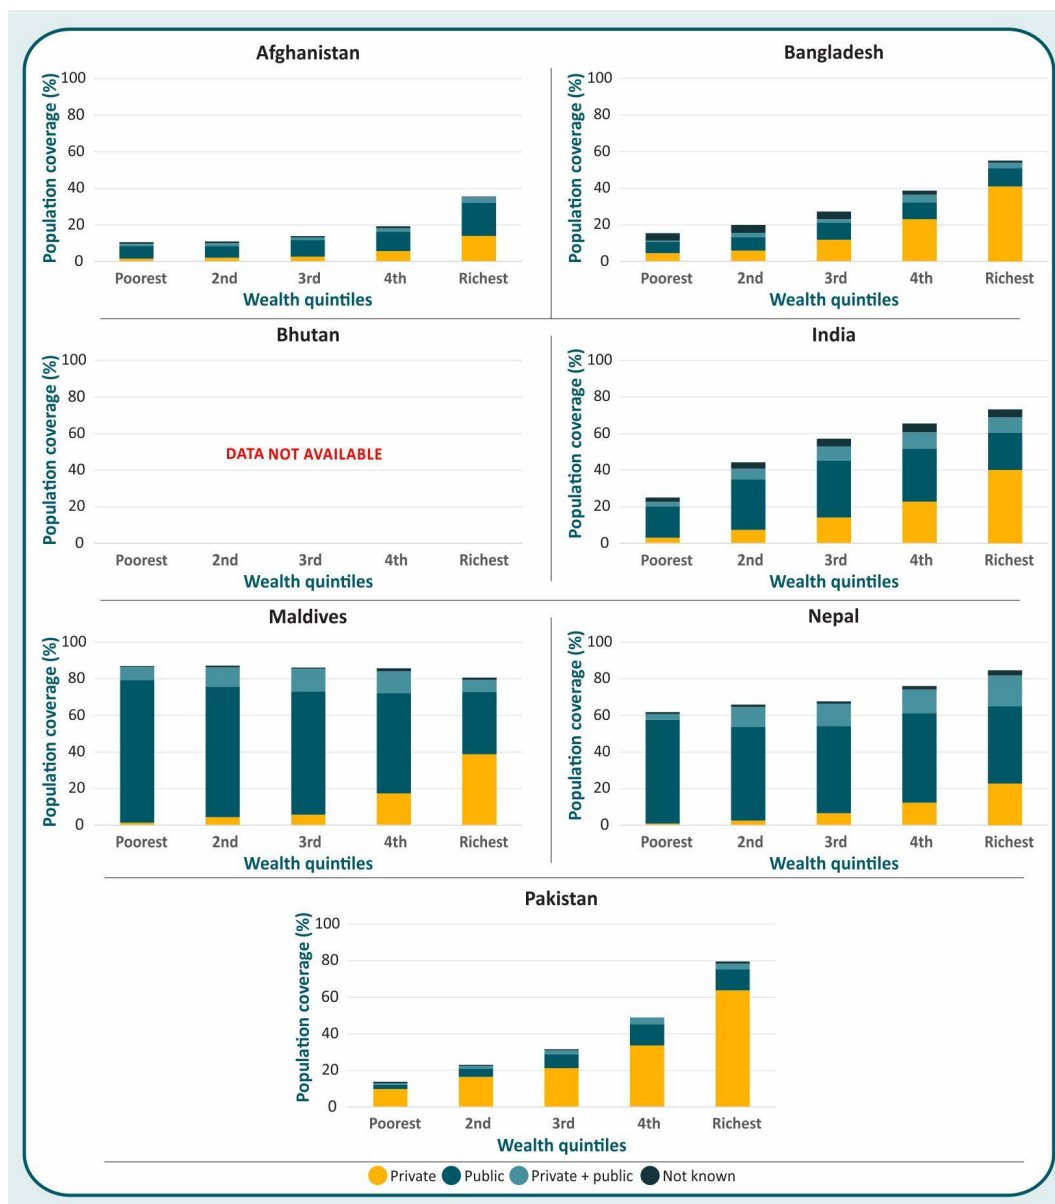

Figure E1. Antenatal care (4+ visits) by wealth quintile, by country.

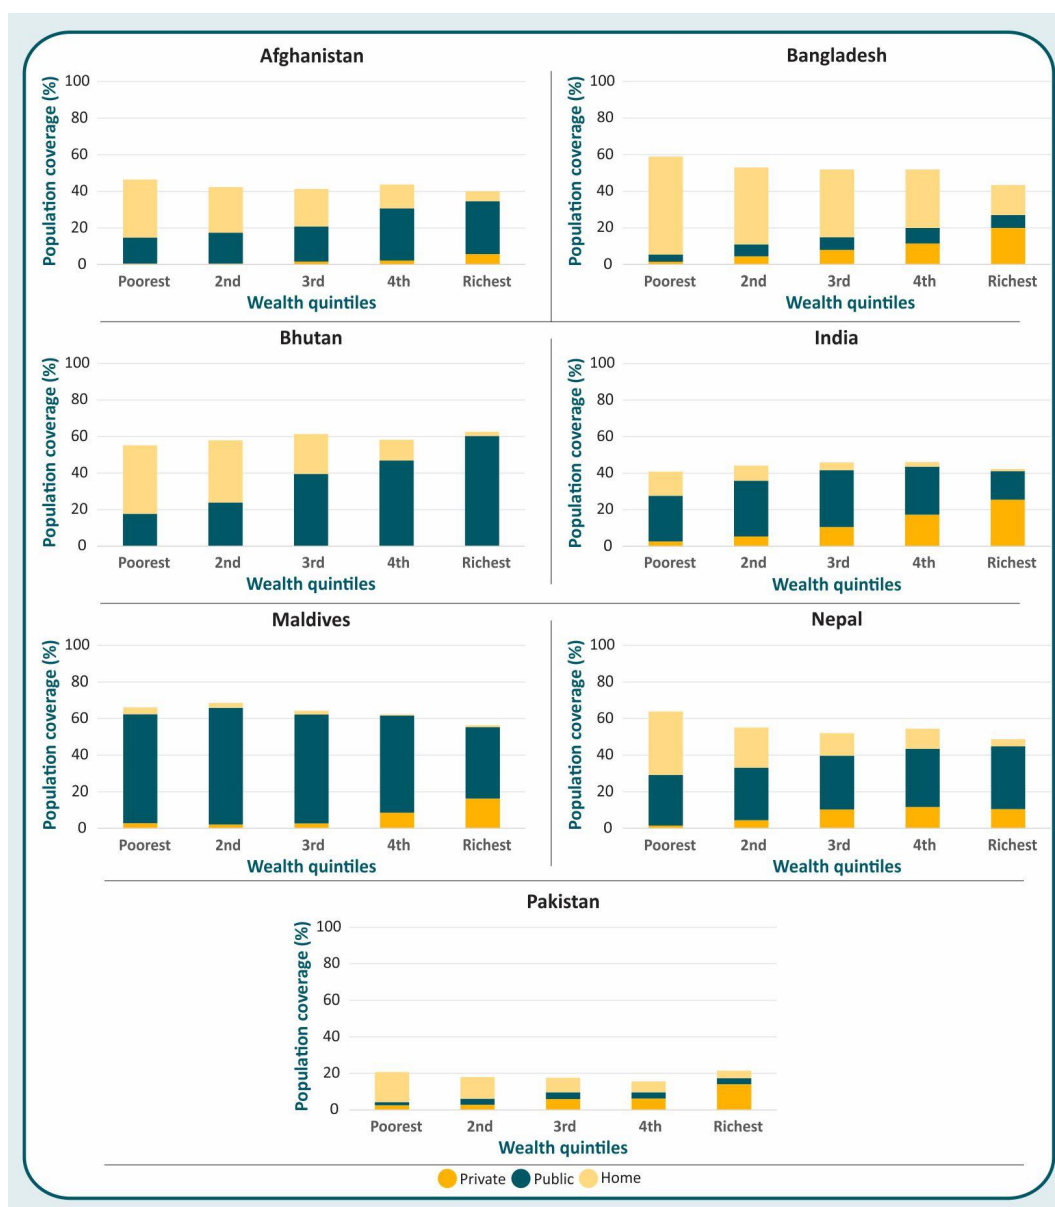

**Figure E2. Early BF initiation by wealth quintile, by country.**

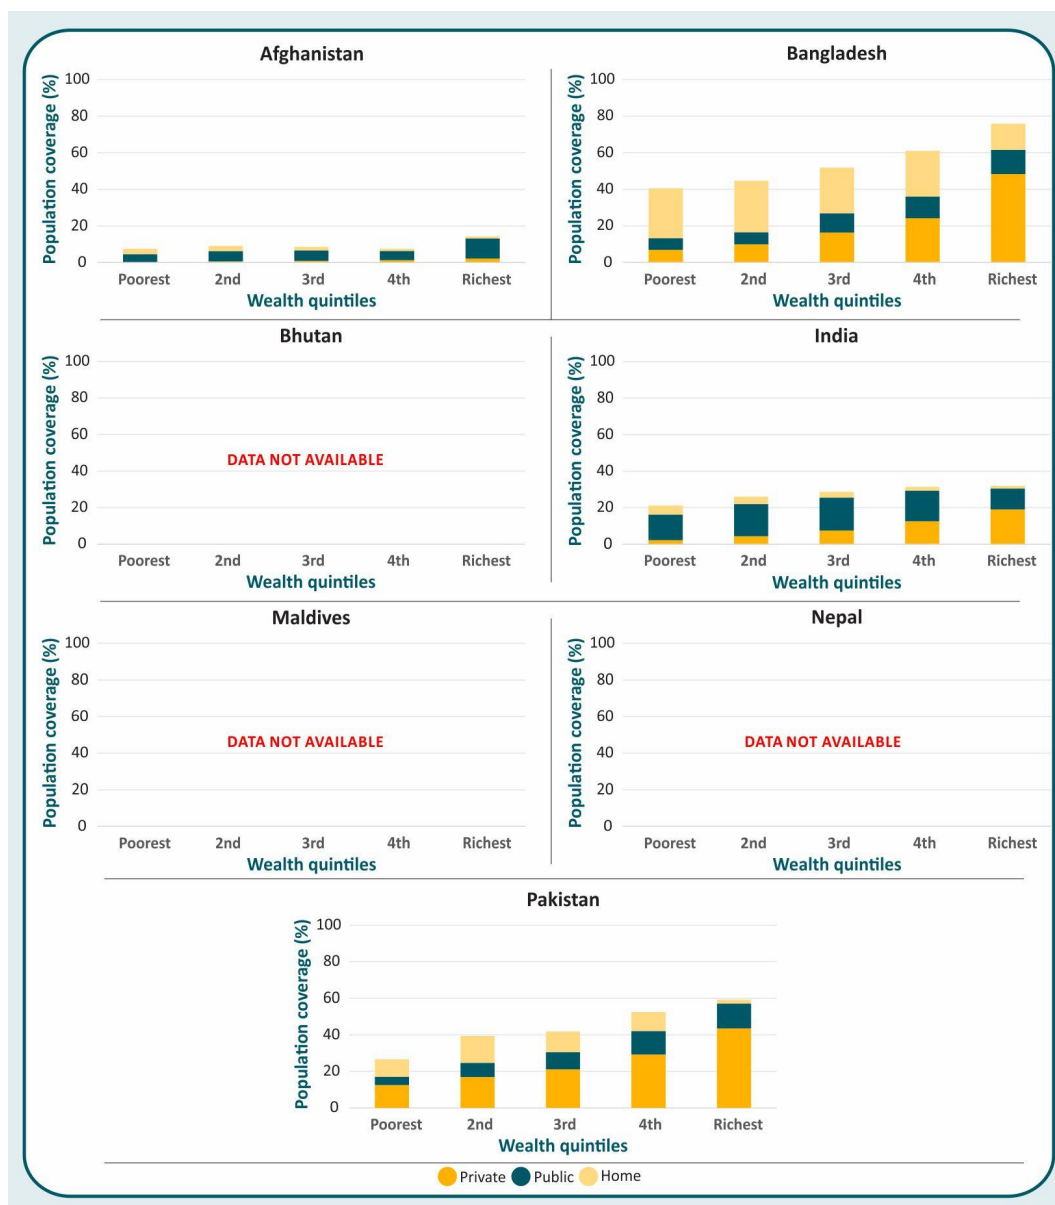

**Figure E3. Postnatal care for babies by wealth quintile, by country.**

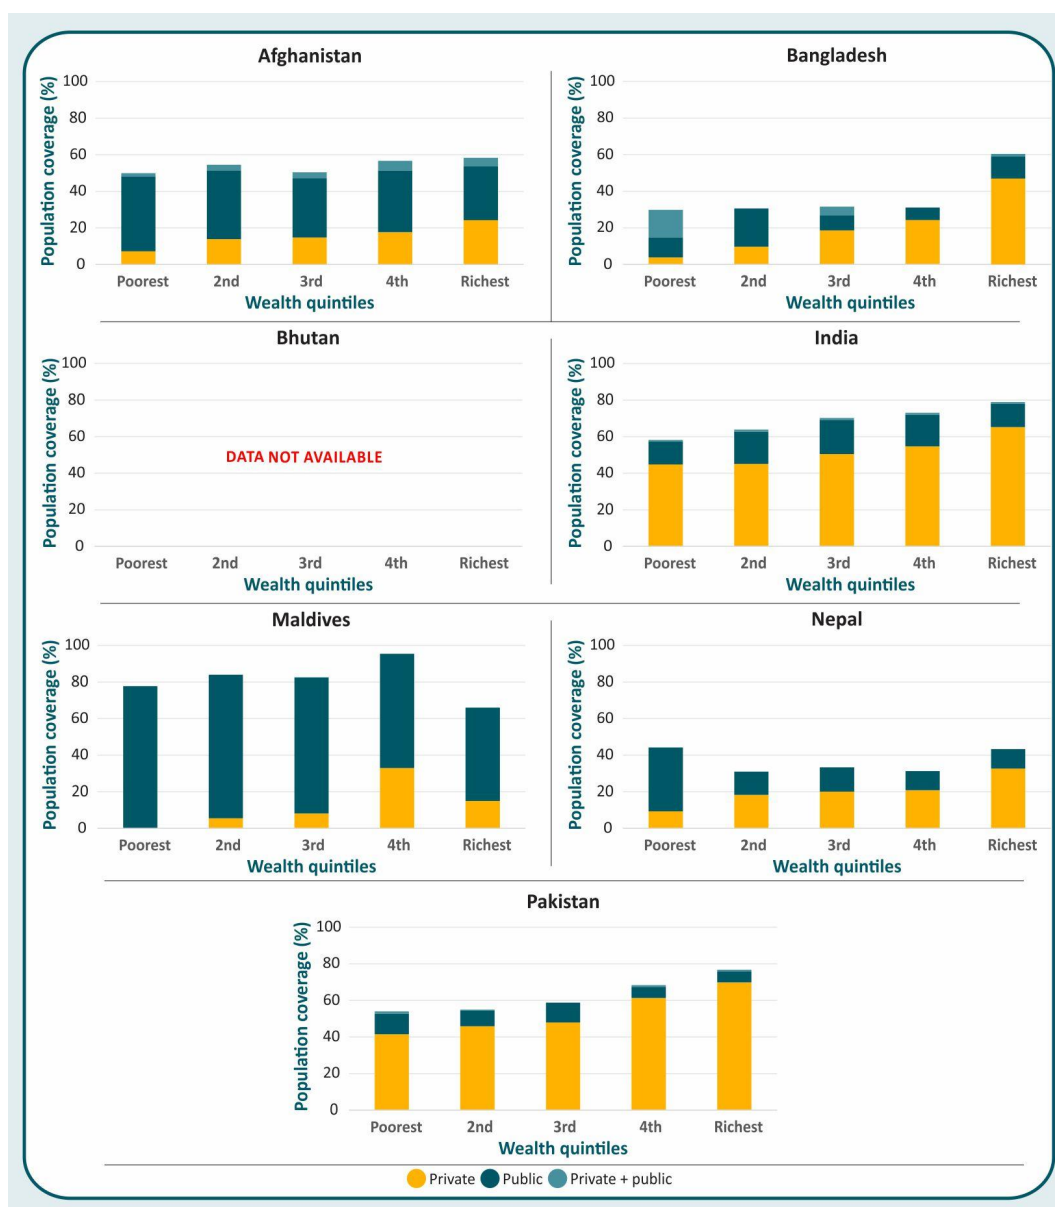

**Figure E4. Care-seeking for diarrhea by wealth quintile, by country.**

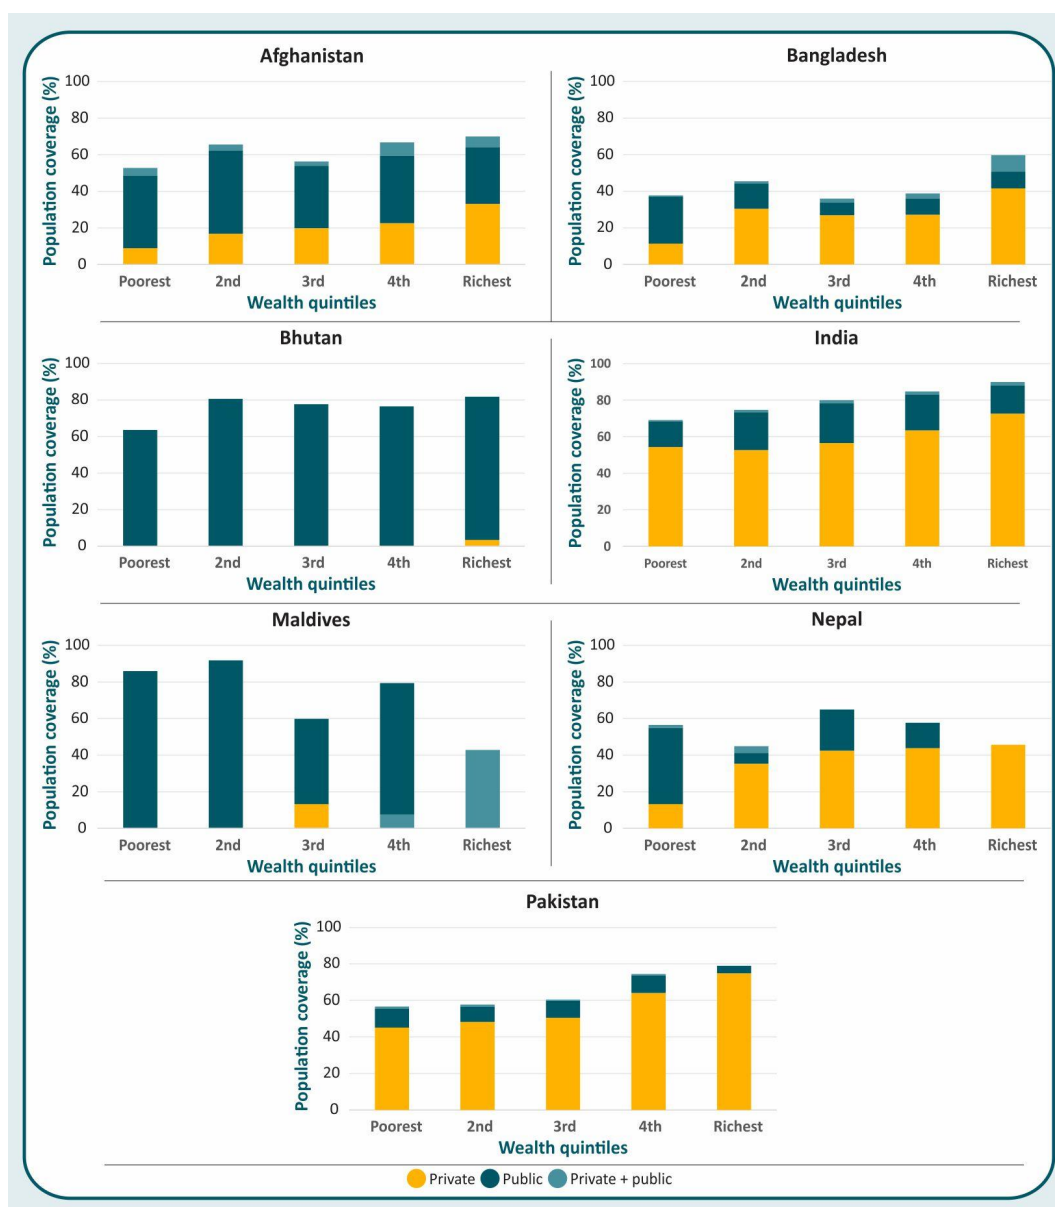

**Figure E5. Care-seeking for pneumonia by wealth quintile, by country.**
