# Supplementary material
Source: HighWire-hosted journal article supplement (https://gh.bmj.com/content/4/4/e001495)
Supplement: inline-supplementary-material-6 [file inline-supplementary-material-6.pdf]

Annex F. Values of the wealth-based concentration index for relative inequality in the public and private sectors, by intervention and country.

| Country     | Antenatal care (4+ visits) |        |         | Institutional delivery |        |         | Early BF initiation |        |         | Postnatal care for baby |        |         | Careseeking for diarrhoea |        |         | Careseeking for pneumonia |        |         |
|-------------|----------------------------|--------|---------|------------------------|--------|---------|---------------------|--------|---------|-------------------------|--------|---------|---------------------------|--------|---------|---------------------------|--------|---------|
|             | Private                    | Public | p-value | Private                | Public | p-value | Private             | Public | p-value | Private                 | Public | p-value | Private                   | Public | p-value | Private                   | Public | p-value |
| Afghanistan | 46.5                       | 20.9   | < 0.001 | 49.4                   | 22.1   | < 0.001 | 48.1                | 15.8   | < 0.001 | 39.6                    | 15.9   | 0.003   | 20.3                      | -6.1   | < 0.001 | 22.9                      | -4.4   | < 0.001 |
| Bangladesh  | 43.7                       | 8.6    | < 0.001 | 39.8                   | 12.4   | < 0.001 | 41.0                | 11.6   | < 0.001 | 38.4                    | 18.2   | < 0.001 | 41.5                      | -9.3   | < 0.001 | 21.6                      | -27.0  | < 0.001 |
| Bhutan      | -                          | -      | -       | 94.0                   | 21.3   | < 0.001 | 87.0                | 23.7   | < 0.001 | -                       | -      | -       | -                         | -      | -       | 89.4                      | 4.8    | < 0.001 |
| India       | 44.7                       | 5.1    | < 0.001 | 38.5                   | -5.2   | < 0.001 | 41.0                | -5.2   | < 0.001 | 40.0                    | -1.0   | < 0.001 | 7.3                       | 3.2    | 0.003   | 5.4                       | 4.2    | 0.594   |
| Maldives    | 53.9                       | -14.0  | < 0.001 | 51.0                   | -4.3   | < 0.001 | 44.9                | -7.8   | < 0.001 | -                       | -      | -       | 50.5                      | -6.1   | < 0.001 | -2.0                      | -18.7  | 0.339   |
| Nepal       | 51.3                       | -4.6   | < 0.001 | 33.7                   | 13.7   | < 0.001 | 30.8                | 4.0    | < 0.001 | -                       | -      | -       | 15.3                      | -24.4  | < 0.001 | 24.4                      | -28.2  | 0.001   |
| Pakistan    | 36.1                       | 30.5   | < 0.001 | 24.2                   | 22.4   | 0.566   | 36.4                | 6.7    | < 0.001 | 25.7                    | 21.0   | 0.345   | 10.4                      | -10.3  | 0.001   | 10.2                      | -7.2   | 0.008   |

Note: Positive values of the concentration index indicate pro-rich inequalities, and are shown in black font, while pro-poor inequalities are shown in red font. Cells highlighted in blue indicate that inequalities were significantly larger in the private than in the public sector; none of the comparisons showed greater inequality in the public than in the private sector. Cells that are not highlighted show similar levels of inequality in both sectors ( $p>0.05$ ).
